# 1 **Exploring Socio-demographic and Geographical** 2 **Variation of Adults Hypertension in Bangladesh:** 3 **Spatial Hotspot Analysis**

4 **Anika Tabashum<sup>1\*</sup>, Chowdhury Mashrur Mahdee<sup>1</sup>, Most. Jannatul Ferdous Asha<sup>1</sup>, Md. Ashraful Islam**  
5 **Khan<sup>1</sup>, Md. Aminur Rahman<sup>1</sup>**

6 <sup>1</sup> Department of Population Science and Human Resource Development, University of Rajshahi, Rajshahi, Bangladesh

7 \* Corresponding author

8 E-mail: [s1912527123@ru.ac.bd](mailto:s1912527123@ru.ac.bd)

## 9 Abstract

10 Hypertension is a chronic medical condition where blood pressure is too high. In Bangladesh, the overall incidence  
11 of hypertension is rising, like in other developing countries. Recent studies show hypertension can cause other non-  
12 communicable diseases such as cardiovascular diseases, strokes, etc. Utilizing information from the Bangladesh  
13 Demographic and Health Survey (BDHS) 2017–18, a cross-sectional and spatial analysis was done to determine the  
14 prevalence of hypertension. The existence of spatial autocorrelation is evaluated by using Moran’s I statistic, hotspot  
15 analysis, cold spot analysis, and influential observation analysis. The study was conducted on the basis of different  
16 factors such as gender, place of residence, age, BMI, etc. Among 12,926 people (43.19% men, 56.81% women), the  
17 women had a higher total prevalence of hypertension (41.18% (95% CI, 41.35–45.67) compared to the men's 58.82%  
18 (95% CI, 57.16–60.45). Out of the total number of observations, 27.47% had hypertension. Out of all hypertensive  
19 people, 57.56% are unaware of their condition, which is very concerning. The study also finds that 28.4% are from  
20 urban areas and 71.6% are from rural areas. People living in the Dhaka division had a higher prevalence of  
21 hypertension (20.5%), and those in Sylhet had the lowest prevalence of hypertension (6.2%). There also exists a  
22 statistically relevant spatial autocorrelation (hypertension: Moran’s I index = 0.27,  $p < 0.001$ ). These are the spatial  
23 clustering maps, and according to the LISA cluster map, the Northeast districts are the cold spots (8), while the  
24 hotspots (4) are Bagerhat, Rajbari, Pirojpur, and Munshiganj. Approximately more than one-fourth of the adult  
25 population of Bangladesh had hypertension. The analysis discovered the hotspots and cold spots of the prevalence of  
26 hypertension. These findings could facilitate awareness and treatment of hypertension and therefore serve as support  
27 for researchers and policymakers.

## 28 Introduction

29 Elevated blood pressure, also known as hypertension, is a critical health problem that increases the chance of  
30 getting kidney, heart, brain, and other disorders.[1]. Additionally, elevated blood pressure can be used as a marker for  
31 other noncommunicable disease (NCD) risk factors, such as gaining weight, dyslipidemia, glucose intolerance, and  
32 the metabolic syndrome. 13% of deaths worldwide are mainly caused by hypertension[2]. Hypertension has emerged  
33 as one of the most challenging issues for global public health due to the prediction that the prevalence of the condition  
34 will rise by 30% by 2025, which is crucial given the increasing global disease burden and disability[3,4].

35 Worldwide, 1.13 billion people are hypertensive. According to recent trends, the prevalence of hypertension among  
36 people in low- and middle-income nations (LMICs) is rising at an alarming rate[5]. On the basis of studies, LMICs  
37 have a higher prevalence of hypertension (31.5%) than high-income countries (28.5%), with the majority of the world's  
38 hypertensive population living in these regions[6]. There is no exception to this rising tendency in LMICs in South  
39 Asia, like Bangladesh[7–9]. The overall hypertension prevalence was first recorded for Bangladesh in 1976 at  
40 1.10%[10]. According to a comprehensive study and meta-analysis of data covering the years 1995–2009, the  
41 hypertension prevalence in the country was 12.8% in men and 16.1% in women[11]. And roughly 28.4% of women  
42 and 26.2% of men who were at least 18 years of age or older have hypertension, depending on the latest Bangladesh  
43 Demographic and Health Survey (BDHS) 2017–18, which corresponds to the population of Bangladesh[9].

44 The ongoing nutritional shift from a standard diet to processed and fast food, rising trends of unhealthy lifestyles  
45 because of increased socioeconomic status, crowded living conditions, and a lack of physical activity as a result of  
46 unplanned urbanization may all play a significant role in the rise of the high blood pressure epidemic in  
47 Bangladesh[12]. Although major communicable diseases have been successfully eliminated in Bangladesh, the  
48 country's health care system is facing a significant challenge from this new pattern of diseases.

49 In this country, the prevalence of hypertension is continuing to increase, and this needs to be controlled as soon as  
50 possible. Additionally, according to the BDHS report, over half of people with hypertension are unaware of their  
51 health condition[9]. So, it's crucial to raise awareness of hypertension among individuals who have it and improve  
52 blood pressure (BP) management among people who use any kind of antihypertensive medication in order to lessen  
53 the burden of consequences emerging from it in the future[13]. Hence, it is needed to identify the causes or factors  
54 that contribute to the prevalence, awareness, and management of hypertension and to treat them through prevention  
55 programs. According to underlying characteristics and variables related to these outcomes in recent years, it is  
56 unknown what percentage of people have a prevalence, knowledge, or treatments for hypertension[14]. Studies on the  
57 relationship between socio-demographic traits and the anticipated prevalence of hypertension have been conducted  
58 using a variety of samples and settings[15]. In order to investigate the risk factors for hypertension in Bangladesh, this  
59 study was conducted using a nationally representative sample population. In this study, we looked at the prevalence,  
60 consciousness, and management of hypertension as well as the socio-demographic variables that affect these results  
61 among adult Bangladeshis.

62 To explore the spatial characteristics of hypertension clusters, spatial clustering of hypertension prevalence has,  
63 however, only occasionally been used, especially at the national level. The objective of our study was to detect any  
64 districts that had a particularly high relative risk of hypertension prevalence. The findings will be used by academics,  
65 researchers, decision-makers, and members of the public health community to generate new regional plans for  
66 hypertension prevention and control.

## 67 **Methods**

### 68 **Data source**

69 Through secondary evaluation of the BDHS 2017–18 data, we were able to do a cross-sectional analysis.[9]. This  
70 is the eighth major national survey that provides data on the nation's demographic and health trends. The list of  
71 enumerated areas (EAs) from the 2011 Population and Housing Census of the People's Republic of Bangladesh,  
72 supplied by the Bangladesh Bureau of Statistics (BBS), serves as the survey's sampling frame (BBS 2011). An EA  
73 containing an average size of around 120 residences serves as the survey's primary sampling unit (PSU). A two-stage,  
74 stratified sample of households was used as the foundation for the survey. With a probability corresponding to EA  
75 size, 675 EAs were selected in the first phase (250 in communities and 425 in rural communities). The survey was  
76 successfully completed in 672 clusters after three clusters (one urban and two rural) were excluded because they had  
77 been entirely destroyed by floodwater. These clusters were in Rangpur (one rural cluster), Rajshahi (one rural cluster),  
78 and Dhaka (one urban cluster). The survey's sample size was 20,160 households in total. In the subsample of a quarter  
79 of the households, blood samples for glucose testing and blood pressure (BP) measurements were drawn from all men  
80 and women age 18 and older (independent of marital status). This subsample contained 12,926 in all (5,583 men and  
81 7,343 women).

### 82 **Outcome variables**

83 Our outcomes of interest included the prevalence, knowledge, medication, and control of hypertension. According  
84 to the survey, diastolic and systolic blood pressure were observed in millimeters of mercury (mmHg). The use of  
85 digital oscillometric BP measurement devices that automatically inflate and deflate the upper arm was completed. The

86 mean of the second and third measures, taken over three measurements spaced at least five minutes apart, served as  
87 the individual blood pressure reading. At the time of the survey, a person was classified as having hypertension if their  
88 average systolic blood pressure (SBP) was 140 mmHg, their average diastolic blood pressure (DBP) was 90 mmHg  
89 or higher, or if they were actively taking antihypertensive medication. The term "awareness of hypertension" was used  
90 to describe hypertensive responders who knew they were hypertensive because a doctor or other health professional  
91 had informed them of their condition. Self-reported usage of prescription antihypertensive medications by those who  
92 have been diagnosed as having high blood pressure is considered to constitute the medication of hypertension. An  
93 average SBP and DBP of less than 140 mmHg and 90 mmHg, respectively, among individuals taking antihypertensive  
94 medication were considered to be under control of hypertension.

## 95 **Explanatory variables**

96 We examined the following as likely variables: place, division of residence, level of education, wealth quintile,  
97 gender, age, overweight/obesity, type 2 diabetes, and published information and reports. Age groups for men and  
98 women were 18–34, 35–44, 45–54, 55–64, and 65 or older. Gender was classified as male or female. According to the  
99 WHO expert consultation, the Asian cut-off point of 18.5 for underweight, 18.5-23.0 for normal weight, 23.0-27.5 for  
100 overweight, and 27.5 for obesity was used to classify BMI[16] because Asians are more likely than Caucasians to  
101 develop type 2 diabetes as well as cardiovascular disease with BMIs below the WHO's current standard. Insulin-  
102 lowering medication, self-reported use, or a fasting blood sugar level above or equivalent to 7.0 mmol/L were regarded  
103 as diabetes indications. There were four categories for education level: no formal education, primary, secondary, and  
104 college or higher. The wealth quintile was classified as poorest, poorer, middle, richer, and richest. Places of residence  
105 were categorized as urban and rural. The eight residential divisions were Barishal, Chittagong, Rajshahi, Rangpur,  
106 Dhaka, Khulna, Mymensingh, and Sylhet.

## 107 **Statistical analysis**

108 For the socio-demographic data and additional potential predictors, a descriptive analysis was conducted. We  
109 calculated the presence of hypertension, consciousness, medical treatment, and control. The imprecise estimates were  
110 adjusted with a sample weight and an effective survey design. The confidence interval (CI) of 95% was employed to

111 represent the result, and the data was considered statistically significant if  $p < 0.05$ . Stata (StataCorp, 2013) software  
112 was used for all descriptive and statistical data analysis (version 13.1).

## 113 **Spatial analysis**

114 To measure the spatial proximity between each potential pair of locations, the spatial weight matrix ( $w$ ) has been  
115 developed. Various methods, including the Queen's, Rook's, and Bishop's methods, can be used to calculate the matrix  
116 depending on how the neighbors are defined. We calculated the matrix here using the Queen's method[17]. This weight  
117 matrix may be interpreted as a distance-based weight or as a measure of contiguity between cells. We conducted a  
118 distance-based weight in this study[18]. As a standard measure of spatial autocorrelation, we first calculated global  
119 and local Moran's I. The Moran's I value are in the range of -1 to 1[19]. When identical values cluster together, the  
120 value "1" denotes perfect positive spatial autocorrelation, but when dissimilar values cluster together, the value "-1"  
121 denotes perfect negative spatial autocorrelation. Also, it is implied that there are random spatial feature distributions  
122 if the local Moran's I value is equal to or close to 0. Additionally, the local Moran's index, also known as the local  
123 indicator of spatial association (LISA)[20], which measures the spatial autocorrelation of an event at a specific  
124 location, was calculated. Moreover, the regional Moran's is utilized to determine the geographic distribution of  
125 hypertension clusters and outliers using five fundamental classifications:

- 126 1. High-High: The High-High classification refers to districts with a high prevalence of hypertension that are  
127 flanked by other counties with a high prevalence. It is also known as a "hot spot."
- 128 2. Low-Low: The Low-Low classification corresponds to districts displaying low levels of hypertension  
129 prevalence that are surrounded by counties with similarly low values. It's called "cold spots."
- 130 3. High-Low: According to the High-Low (spatial outliers) classification, districts with high rates of  
131 hypertension prevalence are surrounded by those with low rates.
- 132 4. Low-High: The Low-High (spatial outliers) classification refers to districts with a low prevalence of  
133 hypertension that are surrounded by a high prevalence.
- 134 5. Not-significant: districts that have spatial patterns but are not statistically significant.

135 With a 95% confidence interval (a 5% level of significance), we plotted the Lisa significance map[21]. The statistical  
 136 level at which each region can be considered to have made a significant contribution to the results of the global spatial  
 137 autocorrelation is shown on this map. All analyses were done using R (version 4.2.1).

## 138 Results

139 The analysis had a total of 12,926 participants, of whom 3551 were hypertensive. Table 1 shows that the  
 140 participants were 39.7 years old on average, with a standard error of 0.16. 58.8% of all hypertensive people are female,  
 141 and 41.2% are male. The average BP was 80.2 mmHg at the diastolic level and 122.4 mmHg at the systolic level  
 142 (Table 1). 27.4% (n = 3542) of total participants are from urban areas, and 72.6% (n = 9384) of total participants are  
 143 from rural areas. Around 26.6% (n = 3444) of the participants lacked a formal education.

144 **Table 1** Distribution of the study sample according to presence of hypertension

| Variables                       | Total<br>(n= 12,926) | Hypertension |            | p-value |
|---------------------------------|----------------------|--------------|------------|---------|
|                                 |                      | Yes(n=3551)  | No(n=9375) |         |
| Mean systolic BP (SE),<br>mmHg  | 122.4                |              |            |         |
| Mean diastolic BP (SE),<br>mmHg | 80.2                 |              |            |         |
| <b>Age (in years)</b>           |                      |              |            |         |
| 18 to 34                        | 5787(44.8)           | 738(20.8)    | 5049(53.9) | <0.001  |
| 35 to 44                        | 2585(20)             | 735(20.7)    | 1850(19.7) |         |
| 45 to 54                        | 1815(14)             | 698(19.7)    | 1116(11.9) |         |
| 55 to 64                        | 1454(11.3)           | 680(19.2)    | 775(8.3)   |         |
| 65 or more                      | 1285(9.9)            | 700(19.7)    | 585(6.2)   |         |
| <b>Gender</b>                   |                      |              |            |         |
| Female                          | 7343(56.8)           | 2089(58.8)   | 5255(56.1) | <0.001  |
| Male                            | 5583(43.2)           | 1462(41.2)   | 4120(44)   |         |
| <b>Diabetes</b>                 |                      |              |            |         |
| No                              | 10893(84.3)          | 2785(78.4)   | 8107(86.5) | <0.001  |
| Yes                             | 2033(15.7)           | 765(21.6)    | 1268(13.5) |         |
| <b>Overweight / Obesity</b>     |                      |              |            |         |
| No                              | 7640(59.8)           | 1573(45.2)   | 6067(65.3) | <0.001  |
| Yes                             | 5132(40.2)           | 1097(54.8)   | 3225(34.7) |         |
| <b>Education level</b>          |                      |              |            |         |
| No formal education             | 3444(26.6)           | 1211(34.1)   | 2233(23.8) | <0.001  |
| Primary                         | 3839(29.8)           | 1047(29.5)   | 2792(29.8) |         |
| Secondary                       | 3790(29.3)           | 877(24.7)    | 2913(31.1) |         |
| College or above                | 1853(14.3)           | 416(11.7)    | 1437(15.3) |         |

| <b>Wealth quintile</b>       |            |            |            |        |
|------------------------------|------------|------------|------------|--------|
| Poorest                      | 2459(19.0) | 584(16.5)  | 1875(20)   | <0.001 |
| Poorer                       | 2534(19.6) | 637(18)    | 1897(20.2) |        |
| Middle                       | 2635(20.4) | 705(19.8)  | 1930(20.6) |        |
| Richer                       | 2560(19.8) | 723(20.4)  | 1837(19.6) |        |
| Richest                      | 2738(21.2) | 902(25.4)  | 1836(19.6) |        |
| <b>Place of residence</b>    |            |            |            |        |
| Urban                        | 3542(27.4) | 1009(28.4) | 2533(27)   | 0.19   |
| Rural                        | 9384(72.6) | 2542(71.6) | 6842(73)   |        |
| <b>Division of residence</b> |            |            |            |        |
| Dhaka                        | 3096(24)   | 730(20.6)  | 2366(25.2) | <0.001 |
| Barishal                     | 718(5.6)   | 234(6.6)   | 484(5.2)   |        |
| Chattagram                   | 2237(17.3) | 666(18.8)  | 1571(16.8) |        |
| Khulna                       | 1586(12.3) | 474(13.3)  | 1112(11.9) |        |
| Mymensingh                   | 1067(8.3)  | 252(7.1)   | 815(8.7)   |        |
| Rajshahi                     | 1829(14.2) | 503(14.2)  | 1326(14.2) |        |
| Rangpur                      | 1552(12)   | 473(13.3)  | 1079(11.5) |        |
| Sylhet                       | 840(6.5)   | 220(6.2)   | 620(6.6)   |        |

145 According to background characteristics, Table 2 displays the prevalence, consciousness, medication and control  
146 of hypertension by gender. Among men, the older age group (65 and older) has a greater prevalence of hypertension,  
147 which is close to 50.64% (95% CI: 46.67%–54.61%). The age group from 18 to 34, which is the youngest age group,  
148 has the lowest prevalence of hypertension (13.24%, 95% CI: 11.64%–15.03%). And for female participants, compared  
149 to younger age groups, older age groups had a prevalence of hypertension that was nearly 59.15% (95% CI: 54.66%–  
150 63.49%). And among the youngest age groups, those between 18 and 34, there was the lowest rate of hypertension  
151 (12.46%, 95% CI: 11.32%–13.70%). The overall hypertension prevalence was higher in urban areas for both male  
152 (27.93%, 95% CI: 25.45%–30.56%) and female (28.91%, 95% CI: 26.99%–30.91%) participants. The analysis shows  
153 that obese individuals, both males (41.58%, 95% CI: 36.09%–47.29%) and females (44.50%, 95% CI: 41.56%–  
154 47.48%), have an increased risk of developing hypertension.

155 In all age categories, among the overall population of hypertensives, more women than men are aware of their  
156 condition and receive treatment for it. However, only in the age categories of 35–44 and 55–64 do women have a  
157 higher prevalence of hypertension control than do men. Once more, urban areas have greater rates of hypertension  
158 awareness (Men: 36.07%, 95% CI: 31.57%–40.83%; Women: 54.70%, 95% CI: 50.57%–58.82%), treatment (Men:  
159 31.05%, 95% CI: 26.91%–35.52%; Women: 49.29%, 95% CI: 45.21%–53.37%), and control (Men: 35.73%, 95% CI:  
160 28.18%–44.06%; Women: 36.19%, 95% CI: 30.25%–42.59%) than rural ones. In addition, women are probable to



161 have more hypertension consciousness, medication, and control than men in both rural and urban regions. The lowest  
 162 levels of awareness, medication, and control of hypertension are found among the poorest individuals of both sexes.  
 163 According to the study, both men and women who are obese are more probable to be conscious of high BP, receive  
 164 medical treatment, and have control over it. Table 2 displays all of the findings.

165 **Table-2:** The prevalence, awareness, and control of hypertension by gender

| Characteristics  | Men                                                  |                     |                     |                     | Women               |                     |                     |                     |
|------------------|------------------------------------------------------|---------------------|---------------------|---------------------|---------------------|---------------------|---------------------|---------------------|
|                  | Prevalence of hypertension (95% Confidence Interval) |                     |                     |                     |                     |                     |                     |                     |
|                  | Hypertension (%)                                     | Aware (%)           | Treated (%)         | Controlled (%)      | Hypertension (%)    | Aware (%)           | Treated (%)         | Controlled (%)      |
| Total            | 26.19 (24.75-27.69)                                  | 33.44 (30.79-36.19) | 28.71 (26.28-31.27) | 31.68 (27.02-36.74) | 28.44 (27.32-29.58) | 48.75 (46.26-51.24) | 42.78 (40.41-45.19) | 34.73 (31.19-38.43) |
| <b>Age</b>       |                                                      |                     |                     |                     |                     |                     |                     |                     |
| 18-34            | 13.24 (11.64-15.03)                                  | 20.59 (15.96-26.15) | 14.08 (10.27-19.01) | 54.47 (37.52-70.45) | 12.46 (11.32-13.70) | 34.12 (29.66-38.88) | 26.88 (22.65-31.59) | 53.83 (43.12-64.19) |
| 35-44            | 22.07 (19.62-24.73)                                  | 25.52 (20.13-31.77) | 21.42 (16.37-27.52) | 35.89 (23.75-50.14) | 33.92 (31.26-36.69) | 44.05 (38.86-49.38) | 37.94 (32.97-43.18) | 39.06 (31.33-47.39) |
| 45-54            | 31.35 (27.63-35.32)                                  | 35.80 (29.59-42.53) | 30.99 (25.08-37.59) | 32.46 (22.18-44.76) | 44.93 (41.29-48.63) | 52.06 (46.69-57.39) | 47.52 (42.11-52.99) | 31.39 (25.01-38.56) |
| 55-64            | 40.76 (36.87-44.78)                                  | 39.31 (33.85-45.06) | 35.13 (29.85-40.80) | 30.90 (21.90-41.62) | 52.45 (48.55-56.32) | 63.28 (58.29-68.01) | 57.94 (52.83-62.89) | 34.39 (27.61-41.87) |
| 65 and above     | 50.64 (46.67-54.61)                                  | 42.69 (37.41-48.14) | 38.49 (33.33-43.92) | 23.63 (17.30-31.40) | 59.15 (54.66-63.49) | 54.14 (48.45-59.72) | 47.58 (41.97-53.26) | 19.99 (14.66-26.64) |
| <b>Residence</b> |                                                      |                     |                     |                     |                     |                     |                     |                     |
| Urban            | 27.93 (25.45-30.56)                                  | 36.07 (31.57-40.83) | 31.05 (26.91-35.52) | 35.73 (28.18-44.06) | 28.91 (26.99-30.91) | 54.70 (50.51-58.82) | 49.29 (45.21-53.37) | 36.19 (30.25-42.59) |
| Rural            | 25.51 (23.77-27.33)                                  | 32.31 (29.08-35.71) | 27.70 (24.75-30.86) | 29.74 (24.02-36.16) | 28.27 (26.92-29.66) | 46.52 (43.49-49.57) | 40.34 (37.49-43.26) | 34.05 (29.75-38.64) |
| <b>Division</b>  |                                                      |                     |                     |                     |                     |                     |                     |                     |
| Barisal          | 30.60 (26.44-35.09)                                  | 30.93 (24.46-38.25) | 28.41 (22.16-35.61) | 38.80 (24.93-54.76) | 34.17 (30.47-38.08) | 53.53 (46.71-60.22) | 46.24 (40.26-52.13) | 33.43 (24.49-43.74) |
| Chittagong       | 27.37 (23.56-31.54)                                  | 37.94 (31.26-45.12) | 34.62 (28.75-40.99) | 39.03 (27.55-51.86) | 31.32 (28.49-34.31) | 48.19 (42.18-54.24) | 44.60 (39.14-50.19) | 42.94 (33.93-52.44) |
| Dhaka            | 23.89 (20.48-27.67)                                  | 35.43 (28.75-42.73) | 30.39 (24.32-37.23) | 27.09 (16.74-40.71) | 23.32 (20.91-25.91) | 53.47 (46.89-59.93) | 49.09 (42.97-55.24) | 35.84 (27.64-44.96) |
| Khulna           | 28.57 (24.67-32.83)                                  | 32.49 (26.08-39.64) | 26.58 (20.52-33.66) | 20.43 (12.51-31.54) | 30.90 (27.86-34.11) | 52.45 (45.78-59.03) | 43.97 (37.44-50.71) | 27.62 (21.04-35.34) |

|                                 |                     |                     |                     |                     |                     |                     |                     |                     |
|---------------------------------|---------------------|---------------------|---------------------|---------------------|---------------------|---------------------|---------------------|---------------------|
| Mymensingh                      | 20.50 (17.28-24.15) | 32.79 (24.68-42.07) | 32.38 (24.29-41.68) | 56.07 (41.67-69.51) | 25.90 (23.02-29.00) | 47.91 (40.14-55.79) | 42.87 (35.99-50.04) | 45.40 (34.20-57.09) |
| Rajshahi                        | 26.84 (23.03-31.02) | 30.69 (24.67-37.44) | 23.78 (18.52-29.99) | 25.16 (14.49-40.02) | 28.00 (24.71-31.55) | 45.30 (38.53-52.25) | 35.47 (28.90-42.63) | 20.54 (13.25-30.44) |
| Rangpur                         | 28.99 (25.54-32.71) | 28.48 (21.60-36.54) | 22.58 (16.59-29.94) | 24.47 (14.47-38.29) | 31.67 (28.91-34.56) | 36.72 (30.91-42.96) | 29.54 (23.92-35.87) | 29.54 (20.14-41.06) |
| Sylhet                          | 24.11 (20.92-27.63) | 37.31 (29.96-45.30) | 33.58 (26.14-41.93) | 37.36 (25.12-51.46) | 27.74 (24.50-31.23) | 56.75 (49.08-64.11) | 54.71 (46.92-62.27) | 38.96 (29.19-49.70) |
| <b>Education</b>                |                     |                     |                     |                     |                     |                     |                     |                     |
| No education                    | 24.48 (21.80-27.37) | 29.74 (24.45-35.63) | 27.41 (22.33-33.15) | 29.59 (20.38-40.82) | 41.95 (39.55-44.39) | 48.25 (44.42-52.10) | 42.80 (39.00-46.68) | 27.20 (22.41-32.58) |
| Primary                         | 24.78 (22.54-27.17) | 29.16 (24.60-34.17) | 25.13 (20.85-29.97) | 33.86 (24.83-44.25) | 29.29 (27.17-31.50) | 53.42 (49.36-57.43) | 46.33 (42.32-50.40) | 34.79 (28.85-41.25) |
| Secondary                       | 27.63 (25.05-30.36) | 38.05 (32.90-43.49) | 32.96 (28.12-38.18) | 30.16 (22.07-39.71) | 20.10 (18.36-21.96) | 45.87 (41.10-50.72) | 39.67 (35.05-44.48) | 44.50 (36.37-52.94) |
| College or higher               | 28.73 (25.59-32.09) | 37.23 (32.12-42.65) | 29.26 (24.49-34.54) | 33.66 (24.66-44.03) | 15.12 (12.83-17.74) | 39.78 (31.46-48.73) | 36.54 (28.48-45.43) | 57.23 (41.84-71.34) |
| <b>Wealth quintile</b>          |                     |                     |                     |                     |                     |                     |                     |                     |
| Poorest                         | 20.05 (17.46-22.91) | 22.49 (16.93-29.23) | 20.14 (15.06-26.40) | 29.62 (17.11-46.19) | 26.40 (23.91-29.06) | 37.95 (32.53-43.68) | 31.97 (27.10-37.27) | 32.84 (24.01-43.08) |
| Poorer                          | 23.49 (20.75-26.48) | 26.43 (21.16-32.48) | 22.59 (17.60-28.52) | 27.07 (16.75-40.66) | 26.42 (23.86-29.15) | 43.14 (37.56-48.90) | 35.42 (30.17-41.06) | 35.33 (27.28-44.31) |
| Middle                          | 24.71 (21.78-27.90) | 30.35 (24.43-37.01) | 27.21 (21.69-33.53) | 26.75 (16.80-39.78) | 28.33 (25.94-30.85) | 49.77 (44.39-55.16) | 44.19 (38.88-49.64) | 34.04 (26.34-42.68) |
| Richer                          | 27.08 (21.16-30.22) | 39.26 (33.54-45.29) | 32.11 (26.77-37.96) | 39.99 (29.23-51.80) | 29.16 (26.52-31.95) | 50.97 (45.79-56.13) | 45.63 (40.64-50.70) | 36.99 (29.44-45.23) |
| Richest                         | 34.74 (31.78-37.83) | 41.24 (36.45-46.20) | 35.43 (30.58-40.60) | 31.16 (23.99-39.37) | 31.59 (29.43-33.82) | 58.54 (53.47-63.45) | 53.08 (48.28-57.83) | 34.13 (28.29-40.50) |
| <b>Nutritional status</b>       |                     |                     |                     |                     |                     |                     |                     |                     |
| Underweight                     | 15.84 (13.64-18.31) | 20.58 (14.76-27.94) | 16.99 (11.78-23.89) | 39.02 (23.19-57.56) | 19.50 (17.03-22.23) | 39.79 (33.29-46.67) | 33.78 (27.46-40.74) | 29.29 (19.64-41.25) |
| Normal                          | 21.48 (19.42-23.34) | 30.69 (26.87-34.79) | 25.79 (22.20-29.74) | 30.55 (23.19-39.06) | 22.03 (20.42-23.73) | 44.68 (40.37-49.07) | 38.41 (34.26-42.72) | 38.20 (31.82-45.01) |
| Overweight                      | 38.17 (35.22-41.22) | 37.74 (33.30-42.40) | 33.00 (28.88-37.39) | 26.65 (20.32-34.10) | 32.76 (30.61-34.98) | 50.35 (46.48-54.22) | 45.30 (41.46-49.19) | 31.75 (26.48-37.53) |
| Obese                           | 41.58 (36.09-47.29) | 41.56 (33.99-49.56) | 36.30 (28.81-44.52) | 45.56 (32.73-59.01) | 44.50 (41.56-47.48) | 55.23 (50.41-59.94) | 48.28 (43.38-53.20) | 37.13 (30.99-43.72) |
| <b>Currently working status</b> |                     |                     |                     |                     |                     |                     |                     |                     |

|                 |                     |                     |                     |                     |                     |                     |                     |                     |
|-----------------|---------------------|---------------------|---------------------|---------------------|---------------------|---------------------|---------------------|---------------------|
| No              | 32.15 (28.69-35.81) | 40.51 (34.51-46.80) | 36.07 (30.05-42.56) | 31.31 (22.32-41.96) | 30.73 (29.31-32.19) | 51.06 (47.94-54.16) | 45.23 (42.30-48.20) | 33.58 (29.30-38.16) |
| Yes             | 25.17 (23.62-26.78) | 31.88 (29.00-34.90) | 27.08 (24.43-29.92) | 31.80 (26.42-37.70) | 25.23 (23.53-27.00) | 44.81 (40.98-48.69) | 38.60 (34.85-42.50) | 37.01 (31.01-43.44) |
| <b>Diabetes</b> |                     |                     |                     |                     |                     |                     |                     |                     |
| No              | 24.30 (22.86-25.79) | 30.61 (27.78-33.59) | 25.87 (23.29-28.64) | 33.01 (27.66-38.83) | 26.35 (25.18-27.55) | 45.75 (43.10-48.41) | 39.43 (36.93-41.99) | 36.45 (32.42-40.68) |
| Yes             | 43.22 (38.33-48.25) | 47.70 (40.93-54.55) | 43.00 (36.41-49.85) | 27.67 (19.19-38.13) | 49.26 (45.05-53.49) | 64.75 (58.88-70.21) | 60.65 (54.78-66.23) | 28.75 (22.75-35.60) |

166 [Fig 1](#) and [Fig 2](#) show how men and women in Bangladesh are divided in terms of their awareness of hypertension  
167 and their treatment status. The four levels of the pie chart—"Aware, not treated," "Aware, controlled," "Aware,  
168 treated," and "Unaware"—are present in each of the eight divisions. In every district, the pie chart indicates that the  
169 majority of men and women with hypertension are unaware that they have the medical condition. The number of  
170 people with hypertension in a district is indicated by the size of the pie chart. There are more hypertensive individuals  
171 in the area where the pie chart is larger.

172 **Fig 1: Awareness of hypertension and treatment status for men in Bangladesh**

173 **Fig 2: Awareness of hypertension and treatment status for women in Bangladesh**

174 Local Moran's I and univariate clustering using the local indicator of spatial association (LISA), as well as  
175 significant maps of the prevalence of hypertension, were created to study the spatial dependency and clustering of  
176 hypertension in Bangladesh. For the dataset, Moran's I is 0.272, which denotes a spatial autocorrelation that is positive.  
177 Positive Moran's I point out that the values in the dataset have a tendency to spatially cluster, which means that high  
178 values tend to cluster close to other high values and low values tend to cluster close to other low values. The univariate  
179 LISA cluster map ([Fig 3](#)) and LISA significance map ([Fig 4](#)) demonstrate that the hotspot points (4 districts) are  
180 located in the districts of Bagerhat, Munshiganj, Pirojpur, and Rajbari; on the other hand, the districts with cold spots  
181 (8 districts) are Bandarban, Habiganj, Kishoreganj, Mymensingh, Netrokona, Sherpur, Sunamganj, and Sylhet. The  
182 statistical level at which any region can be considered to be significantly contributing to the results of the global spatial  
183 autocorrelation is displayed on the LISA significance map ([Fig 4](#)). Statistical significance is determined at the 0.001  
184 (or 0.01 or 0.05) level if an actual LISA score is in the top 0.1% (or 1% or 5%) of scores connected to that area under  
185 randomization. An outcome that is statistically relevant can be either extremely high or extremely low.

186 **Fig 3: LISA Cluster Map**

187 **Fig 4: LISA Significance Map**

## 188 **Discussion**

189 Using BDHS 2017–18 data, we calculated the prevalence of the condition, along with its consciousness,  
190 medication, and control of the condition, and identified risk factors related to it. According to our data, Bangladesh  
191 has a significant prevalence of hypertension. More than one in four adults in Bangladesh might suffer from  
192 hypertension, according to this study. In contrast, one in every three adults in low- and middle-income countries  
193 (LMICs) suffers from hypertension[22,23]. We also discovered other related factors for these outcomes, including  
194 age, gender, living in different locations and divisions, education, wealth quintiles, diabetes, and being overweight or  
195 obese.

196 Among total hypertensive individuals, 33.44% of men (95% CI: 30.79%–36.19%) and 48.75% of women (95%  
197 CI: 46.26%–51.24%) were conscious of their condition, indicating that women were more conscious of hypertension  
198 than men. In men, 28.71% (95% CI: 26.28%–31.27%) of those who had hypertension were being treated, and 31.68%  
199 (95% CI: 27.02%–36.74%) had the condition under control. In contrast, among women, 34.73% (95% CI: 31.19%–  
200 38.43%) of hypertensive patients had their hypertension under control, while 42.78% (95% CI: 40.41%–45.19%) were  
201 receiving treatment for their condition. We can conclude from the data that women were more likely than men to  
202 undergo treatment for their hypertension and keep control over it.

203 We also observed comparable results when comparing our findings with those of reports from other neighboring  
204 areas. The overall prevalence of hypertension in India was 47.5% in males and 48.4% in females[24]. In Sri Lanka,  
205 28.1% (95% CI: 25.9%–30.3%) of men and 28.2% (95% CI: 26.4%–30.0%) of women were hypertensive[25]. 29.7%  
206 (95% CI: 24.1%–35.4%) of men and 31.5% (95% CI: 27.5%–38.4%) of women in the Maldives had hypertension  
207 prevalence[26]. The overall prevalence of hypertension in Pakistan was 24.99% in males and 24.76% in females[27].  
208 And in China, 30.6% of males and 35.5% of females had hypertension prevalence[28]. In the Indonesian study  
209 population, the overall prevalence of hypertension was reported at 33.4% (95% CI: 32.7%–34.0%), 31.0% (95% CI:  
210 30.2%–31.9%) for men, and 35.4% (95% CI: 34.6%–36.3%) for women.[29].

211 As in Bangladesh, the prevalence of hypertension has increased in these countries as well[30,31]. In the majority  
212 of countries, women were more likely than men to have hypertension[24,26,27,29,30,32]. Lifestyle, environment, and  
213 food habits differ significantly between urban and rural areas in developing countries like Bangladesh[33]. Rapidly  
214 expanding unplanned urbanization, as witnessed in emerging nations, has the potential to cause changes in lifestyles  
215 (such as changes in stress levels, physical activity, food, and environment)[34]. In our study, a greater pooled  
216 prevalence of hypertension was found among the urban population, demonstrating the strong relationship between  
217 these factors and a higher prevalence of hypertension.

218 Hypertension was associated with gender, age, BMI, type 2 diabetes, and several administrative areas in the  
219 country. According to our study, obesity is highly associated with hypertension[35,36].

220 If we compare awareness of hypertension with that of other Asian countries, 43.79% of men and 27.41% of women  
221 are aware of being hypertensive[37]. That indicates men are more aware than women in the Maldives, which is the  
222 opposite scenario compared to Bangladesh. In Pakistan, awareness and control of hypertension among women  
223 (Awareness: 67.8%; Control: 24.3%) are higher than among men (Awareness: 58%; Control: 20.1%)[38]. Also in  
224 China, women (51.0%) are more aware of hypertension than men (35.1%)[39]. Treatment (Men: 26.8%; Women:  
225 42.3%) and control (Men: 7.6%; Women: 11.3%) are also higher among women than among men in China[39]. Also  
226 in Indonesia, women are more inclined to be conscious of their condition, receive treatment, and have control over  
227 hypertension than men[40].

228 Numerous factors, including a nation's economic situation[41], age[42], wealth quintile[43], obesity[44],  
229 diabetes[45], and education level[46], had an extensive impact on the occurrence, knowledge, treatment, and control  
230 of hypertension. People with diabetes or obesity may require more medical attention than those without these  
231 conditions, which may account for their greater concern about the problem[47]. People in rural regions and those with  
232 lower levels of wealth have generally lower levels of awareness; this difference in awareness may be due to variations  
233 in access to, availability of, and behavior with regard to health care[9].

234 Researchers have recently used statistical methods and spatial analysis to investigate the spatial variation in  
235 hypertensive conditions. For this spatial analysis, local and global Moran's I were obtained. The Geographical  
236 Autocorrelation (the global Moran's I) simultaneously computes the spatial autocorrelation on the basis of feature

237 positions and values [48]. It examines if the pattern is random, dispersed, or clustered when a set of qualities and  
238 corresponding attributes are present[49]. There is no difference between the local and global Moran's I. Local Moran's  
239 I also discovers geographical clustering of the values in addition to outliers of the data[20,50].

240 Instead of directly comparing the attribute values of neighboring features to each other, Moran's index compares  
241 the values for every characteristic in the pair to the average value for the dataset. The values of the features are  
242 clustered if the average difference between neighboring values is less than the mean between all characteristics[51].  
243 The Moran's index result showed that the spatial autocorrelation was positive for the prevalence of hypertension in  
244 Bangladesh. Similar values for this data have a tendency to cluster together in response to positive spatial  
245 autocorrelation[17,52].

246 Moran's I statistic was used to perform a hotspot analysis as well. According to our data, the hotspot analysis shows  
247 the high-high (hotspot) and low-low (cold spot) districts based on the prevalence of hypertension[53]. The cluster  
248 points were displayed on a LISA cluster diagram that was created via local Moran's I.[54]. The LISA cluster  
249 map displays spatial outliers (high-low and low-high areas) as well as statistically not significant areas in addition to  
250 hot spots and cold spots. Four districts are shown on the LISA cluster map as hotspots, indicating that there is a high  
251 prevalence of hypertension in those four districts. On the other hand, the map has eight districts as cold spots,  
252 indicating those eight districts have a low prevalence of hypertension.

253 Locations with noticeable local statistics were pictured on the map of local significance in order of their level of  
254 significance. Significance was based on a permutation test. It displays the districts that have a significant impact on  
255 spatial autocorrelation[17,21,55]. The value becomes significant at a level of 0.1%, 1%, or 5%.

256 There are many benefits to this study. It used a large, regionally representative sample and included all individuals  
257 residing in non-institutional housing units across the nation[9]. This study is further strengthened by the utilization of  
258 precise measuring techniques for clinical variables such as blood pressure, weight of the person, and height.  
259 Additionally, rather than relying on self-reporting, the measurements of hypertension were taken by skilled and  
260 experienced health professionals using WHO-recommended techniques. In contrast to other cross-sectional studies  
261 conducted in Bangladesh, DHS uses reliable and accepted data collection methods, which reduce measurement error  
262 and bias. And 99% of respondents responded in total[9]. Additionally, the decision-making process is enhanced by

263 the spatial analysis. Spatial analysis is used to determine where and how common hypertension is under specific  
264 circumstances.

265 Even though our study had many positive aspects, it also had some shortcomings. Our capacity to establish causal  
266 relationships is restricted because this study was cross-sectional. Other limitations included the fact that  
267 antihypertensive therapy was self-reported and that our definitions of hypertension and blood pressure management  
268 were established on blood pressure data from one point in time. Furthermore, a sizeable portion of those who had  
269 hypertension were not questioned about their medication status since they were not aware that they had hypertension.  
270 Despite the fact that diet, exercise, and smoking are significant predictors of hypertension, these data were not gathered  
271 since they could not be taken into consideration in the analyses. The smaller geographic units should be the focus of  
272 future data collection activities. The boundaries of the subdistricts, which reflect administrative requirements instead  
273 of the actual spatial distribution, are another downside of our approach. Due to the fact that computations are typically  
274 based on the spatial neighborhood surrounding each feature, some spatial statistical approaches may call for  
275 information on characteristics that refer to spatial units outside the study area. If certain boundary data are not  
276 obtainable, this problem reflects a type of data incompleteness. The Getis-Ord General G-statistic was not utilized in  
277 this analysis to determine the concentration of values, which was another limitation.

## 278 **Conclusion**

279 Although hypertension is fairly common in Bangladesh, knowledge, treatment, and management remain  
280 comparatively low. Therefore, efforts to raise awareness about hypertension, medication, and control need to be given  
281 high importance in order to reduce the overall hypertension prevalence and improve hypertension control in  
282 Bangladesh, regardless of the risks connected with it and its management. In spatial pattern analysis, the LISA statistic  
283 can be used to investigate the prevalence of hypertension in relation to clusters. Additionally, LISA can identify the  
284 central focus of hypertension clusters with high and low prevalence. In terms of constructive strategies and actions  
285 with regard to the hotspot areas, the health and human development sectors must be given priority. These should  
286 include health promotion and hypertension prevention, proactive case reporting, rapid treatment and rehabilitation for  
287 those suffering from hypertension and its complications, and preventative case reporting. The map could be used as a  
288 reference to identify risk factors in the various locations, which could lead to more effective hypertension prevention  
289 and control initiatives that are applicable to the socio-economic context.

## 290 Acknowledgement

291 For permission to use the BDHS 17\_18 dataset, the authors expressed their gratitude to MEASURE DHS.

## 292 Reference

- 293 [1] GBD 2017 Risk Factor Collaborators. Global, regional, and national comparative risk assessment of 84  
294 behavioural, environmental and occupational, and metabolic risks or clusters of risks for 195 countries and  
295 territories, 1990-2017: a systematic analysis for the Global Burden of Disease Study 2017. *Lancet Lond Engl*  
296 2018;392:1923–94. [https://doi.org/10.1016/S0140-6736\(18\)32225-6](https://doi.org/10.1016/S0140-6736(18)32225-6).
- 297 [2] Thomas H, Diamond J, Vieco A, Chaudhuri S, Shinnar E, Cromer S, et al. Global Atlas of Cardiovascular  
298 Disease 2000-2016: The Path to Prevention and Control. *Glob Heart* 2018;13:143–63.  
299 <https://doi.org/10.1016/j.gheart.2018.09.511>.
- 300 [3] Kearney PM, Whelton M, Reynolds K, Muntner P, Whelton PK, He J. Global burden of hypertension: analysis  
301 of worldwide data. *Lancet Lond Engl* 2005;365:217–23. [https://doi.org/10.1016/S0140-6736\(05\)17741-1](https://doi.org/10.1016/S0140-6736(05)17741-1).
- 302 [4] Lawes CMM, Vander Hoorn S, Law MR, Elliott P, MacMahon S, Rodgers A. Blood pressure and the global  
303 burden of disease 2000. Part II: estimates of attributable burden. *J Hypertens* 2006;24:423–30.  
304 <https://doi.org/10.1097/01.hjh.0000209973.67746.f0>.
- 305 [5] Zhou B, Bentham J, Cesare MD, Bixby H, Danaei G, Cowan MJ, et al. Worldwide trends in blood pressure  
306 from 1975 to 2015: a pooled analysis of 1479 population-based measurement studies with 19·1 million  
307 participants. *The Lancet* 2017;389:37–55. [https://doi.org/10.1016/S0140-6736\(16\)31919-5](https://doi.org/10.1016/S0140-6736(16)31919-5).
- 308 [6] Mills KT, Bundy JD, Kelly TN, Reed JE, Kearney PM, Reynolds K, et al. Global Disparities of Hypertension  
309 Prevalence and Control: A Systematic Analysis of Population-Based Studies From 90 Countries. *Circulation*  
310 2016;134:441–50. <https://doi.org/10.1161/CIRCULATIONAHA.115.018912>.
- 311 [7] Chowdhury MZI, Rahman M, Akter T, Akhter T, Ahmed A, Shovon MA, et al. Hypertension prevalence and  
312 its trend in Bangladesh: evidence from a systematic review and meta-analysis. *Clin Hypertens* 2020;26:10.  
313 <https://doi.org/10.1186/s40885-020-00143-1>.
- 314 [8] Al Kibria GM, Swasey K, Hasan MdZ, Choudhury A, Gupta RD, Abariga SA, et al. Determinants of  
315 hypertension among adults in Bangladesh as per the Joint National Committee 7 and 2017 American College



- 316 of Cardiology/American Hypertension Association hypertension guidelines. *J Am Soc Hypertens JASH*  
317 2018;12:e45–55. <https://doi.org/10.1016/j.jash.2018.10.004>.
- 318 [9] Niport NI of PR and T-, Welfare M of H and F, ICF. Bangladesh Demographic and Health Survey 2017-18  
319 2020.
- 320 [10] Malik A. Congenital and acquired heart diseases: (A survey of 7062 persons). *Bangladesh Med Res Counc Bull*  
321 1976;2:115–9.
- 322 [11] Saquib N, Saquib J, Ahmed T, Khanam MA, Cullen MR. Cardiovascular diseases and type 2 diabetes in  
323 Bangladesh: a systematic review and meta-analysis of studies between 1995 and 2010. *BMC Public Health*  
324 2012;12:434. <https://doi.org/10.1186/1471-2458-12-434>.
- 325 [12] Islam AKMM, Majumder A a. S. Coronary artery disease in Bangladesh: a review. *Indian Heart J* 2013;65:424–  
326 35. <https://doi.org/10.1016/j.ihj.2013.06.004>.
- 327 [13] Alam DS, Chowdhury MAH, Siddiquee AT, Ahmed S, Niessen LW. Awareness and control of hypertension in  
328 Bangladesh: follow-up of a hypertensive cohort. *BMJ Open* 2014;4:e004983. [https://doi.org/10.1136/bmjopen-](https://doi.org/10.1136/bmjopen-2014-004983)  
329 2014-004983.
- 330 [14] Rahman M, Williams G, Al Mamun A. Gender differences in hypertension awareness, antihypertensive use and  
331 blood pressure control in Bangladeshi adults: findings from a national cross-sectional survey. *J Health Popul*  
332 *Nutr* 2017;36:23. <https://doi.org/10.1186/s41043-017-0101-5>.
- 333 [15] Zhang B, Menzin J, Friedman M, Korn JR, Burge RT. Predicted coronary risk for adults with coronary heart  
334 disease and low HDL-C: an analysis from the US National Health and Nutrition Examination Survey. *Curr Med*  
335 *Res Opin* 2008;24:2711–7. <https://doi.org/10.1185/03007990802363198>.
- 336 [16] Lim JU, Lee JH, Kim JS, Hwang YI, Kim T-H, Lim SY, et al. Comparison of World Health Organization and  
337 Asia-Pacific body mass index classifications in COPD patients. *Int J Chron Obstruct Pulmon Dis* 2017;12:2465–  
338 75. <https://doi.org/10.2147/COPD.S141295>.
- 339 [17] Anselin L, Syabri I, Kho Y. *GeoDa: An Introduction to Spatial Data Analysis*. *Geogr Anal* 2006;38:5–22.  
340 <https://doi.org/10.1111/j.0016-7363.2005.00671.x>.
- 341 [18] Anselin L, Smirnov O. Efficient Algorithms for Constructing Proper Higher Order Spatial Lag Operators\*. *J*  
342 *Reg Sci* 1996;36:67–89. <https://doi.org/10.1111/j.1467-9787.1996.tb01101.x>.

- 343 [19] Moran PAP. Notes on Continuous Stochastic Phenomena. *Biometrika* 1950;37:17–23.  
344 <https://doi.org/10.2307/2332142>.
- 345 [20] Local Spatial Autocorrelation (1) 2022. [https://geodacenter.github.io/workbook/6a\\_local\\_auto/lab6a.html](https://geodacenter.github.io/workbook/6a_local_auto/lab6a.html)  
346 (accessed November 30, 2022).
- 347 [21] Project 4: Local Indicators of Spatial Association | GEOG 586: Geographic Information Analysis 2022.  
348 <https://www.e-education.psu.edu/geog586/node/673> (accessed November 30, 2022).
- 349 [22] Sarki AM, Nduka CU, Stranges S, Kandala N-B, Uthman OA. Prevalence of Hypertension in Low- and Middle-  
350 Income Countries: A Systematic Review and Meta-Analysis. *Medicine (Baltimore)* 2015;94:e1959.  
351 <https://doi.org/10.1097/MD.0000000000001959>.
- 352 [23] Mills KT, Bundy JD, Kelly TN, Reed JE, Kearney PM, Reynolds K, et al. Global Disparities of Hypertension  
353 Prevalence and Control. *Circulation* 2016;134:441–50.  
354 <https://doi.org/10.1161/CIRCULATIONAHA.115.018912>.
- 355 [24] Gupta PC, Gupta R, Pednekar MS. Hypertension prevalence and blood pressure trends in 88 653 subjects in  
356 Mumbai, India. *J Hum Hypertens* 2004;18:907–10. <https://doi.org/10.1038/sj.jhh.1001763>.
- 357 [25] Rannan-Eliya RP, Wijemunige N, Perera P, Kapuge Y, Gunawardana N, Sigera C, et al. Prevalence and  
358 Associations of Hypertension in Sri Lankan Adults: Estimates from the SLHAS 2018–19 Survey Using JNC7  
359 and ACC/AHA 2017 Guidelines. *Glob Heart* 2022;17:50. <https://doi.org/10.5334/gh.1135>.
- 360 [26] Aboobakur M, Latheef A, Mohamed AJ, Moosa S, Pandey RM, Krishnan A, et al. Surveillance for non-  
361 communicable disease risk factors in Maldives: results from the first STEPS survey in Male. *Int J Public Health*  
362 2010;55:489–96. <https://doi.org/10.1007/s00038-009-0114-y>.
- 363 [27] Shah N, Shah Q, Shah AJ. The burden and high prevalence of hypertension in Pakistani adolescents: a meta-  
364 analysis of the published studies. *Arch Public Health* 2018;76:1–10. [https://doi.org/10.1186/s13690-018-0265-](https://doi.org/10.1186/s13690-018-0265-5)  
365 5.
- 366 [28] Xu L, Lai D, Fang Y. Spatial analysis of gender variation in the prevalence of hypertension among the middle-  
367 aged and elderly population in Zhejiang Province, China. *BMC Public Health* 2016;16:447.  
368 <https://doi.org/10.1186/s12889-016-3121-y>.

- 369 [29] Peltzer K, Pengpid S. The Prevalence and Social Determinants of Hypertension among Adults in Indonesia: A  
370 Cross-Sectional Population-Based National Survey. *Int J Hypertens* 2018;2018:5610725.  
371 <https://doi.org/10.1155/2018/5610725>.
- 372 [30] World Health Organization. Noncommunicable diseases country profiles 2018. Geneva: World Health  
373 Organization; 2018.
- 374 [31] Singh RB, Suh IL, Singh VP, Chaithiraphan S, Laothavorn P, Sy RG, et al. Hypertension and stroke in Asia:  
375 prevalence, control and strategies in developing countries for prevention. *J Hum Hypertens* 2000;14:749–63.  
376 <https://doi.org/10.1038/sj.jhh.1001057>.
- 377 [32] Malavige GN, de Alwis NMW, Weerasooriya N, Fernando DJS, Siribaddana SH. Increasing diabetes and  
378 vascular risk factors in a sub-urban Sri Lankan population. *Diabetes Res Clin Pract* 2002;57:143–5.  
379 [https://doi.org/10.1016/s0168-8227\(02\)00015-3](https://doi.org/10.1016/s0168-8227(02)00015-3).
- 380 [33] Chowdhury MZI, Haque MA, Farhana Z, Anik AM, Chowdhury AH, Haque SM, et al. Prevalence of  
381 cardiovascular disease among Bangladeshi adult population: a systematic review and meta-analysis of the  
382 studies. *Vasc Health Risk Manag* 2018;14:165. <https://doi.org/10.2147/VHRM.S166111>.
- 383 [34] Prevalence of metabolic syndrome in Bangladesh: a systematic review and meta-analysis of the studies -  
384 PubMed 2022. <https://pubmed.ncbi.nlm.nih.gov/29499672/> (accessed November 30, 2022).
- 385 [35] Jiang S-Z, Lu W, Zong X-F, Ruan H-Y, Liu Y. Obesity and hypertension. *Exp Ther Med* 2016;12:2395.  
386 <https://doi.org/10.3892/etm.2016.3667>.
- 387 [36] Hall JE, do Carmo JM, da Silva AA, Wang Z, Hall ME. Obesity-induced hypertension: interaction of  
388 neurohumoral and renal mechanisms. *Circ Res* 2015;116:991–1006.  
389 <https://doi.org/10.1161/CIRCRESAHA.116.305697>.
- 390 [37] Singh S, Srivastava K, Misra SK, Gupta SC, Kaushal SK. A Cross-sectional study of awareness and treatment  
391 seeking behaviour of hypertensive people of rural and urban area of Agra District. *Indian J Forensic Community*  
392 *Med n.d.*:5.
- 393 [38] Shafi ST, Shafi T. A survey of hypertension prevalence, awareness, treatment, and control in health screening  
394 camps of rural central Punjab, Pakistan. *J Epidemiol Glob Health* 2017;7:135–40.  
395 <https://doi.org/10.1016/j.jegh.2017.01.001>.

- 396 [39] Wang J, Zhang L, Wang F, Liu L, Wang; H, the China National Survey of Chronic Kidney Disease Working  
397 Group. Prevalence, Awareness, Treatment, and Control of Hypertension in China: Results From a National  
398 Survey. *Am J Hypertens* 2014;27:1355–61. <https://doi.org/10.1093/ajh/hpu053>.
- 399 [40] Sujarwoto S, Maharani A. Participation in community-based health care interventions (CBHIs) and its  
400 association with hypertension awareness, control and treatment in Indonesia. *PLOS ONE* 2020;15:e0244333.  
401 <https://doi.org/10.1371/journal.pone.0244333>.
- 402 [41] Chow CK, Teo KK, Rangarajan S, Islam S, Gupta R, Avezum A, et al. Prevalence, Awareness, Treatment, and  
403 Control of Hypertension in Rural and Urban Communities in High-, Middle-, and Low-Income Countries.  
404 *JAMA* 2013;310:959–68. <https://doi.org/10.1001/jama.2013.184182>.
- 405 [42] Al Kibria GM, Gupta RD, Nayeem J. Prevalence, awareness, and control of hypertension among Bangladeshi  
406 adults: an analysis of demographic and health survey 2017–18. *Clin Hypertens* 2021;27:17.  
407 <https://doi.org/10.1186/s40885-021-00174-2>.
- 408 [43] Khan MN, Oldroyd JC, Chowdhury EK, Hossain MB, Rana J, Renzetti S, et al. Prevalence, awareness,  
409 treatment, and control of hypertension in Bangladesh: Findings from National Demographic and Health Survey,  
410 2017-2018. *J Clin Hypertens Greenwich Conn* 2021;23:1830–42. <https://doi.org/10.1111/jch.14363>.
- 411 [44] NCD Risk Factor Collaboration (NCD-RisC). Worldwide trends in body-mass index, underweight, overweight,  
412 and obesity from 1975 to 2016: a pooled analysis of 2416 population-based measurement studies in 128·9  
413 million children, adolescents, and adults. *Lancet Lond Engl* 2017;390:2627–42. [https://doi.org/10.1016/S0140-](https://doi.org/10.1016/S0140-6736(17)32129-3)  
414 [6736\(17\)32129-3](https://doi.org/10.1016/S0140-6736(17)32129-3).
- 415 [45] Chowdhury MAB, Uddin MJ, Khan HMR, Haque MR. Type 2 diabetes and its correlates among adults in  
416 Bangladesh: a population based study. *BMC Public Health* 2015;15:1070. [https://doi.org/10.1186/s12889-015-](https://doi.org/10.1186/s12889-015-2413-y)  
417 [2413-y](https://doi.org/10.1186/s12889-015-2413-y).
- 418 [46] Williams MV, Baker DW, Parker RM, Nurss JR. Relationship of Functional Health Literacy to Patients’  
419 Knowledge of Their Chronic Disease: A Study of Patients With Hypertension and Diabetes. *Arch Intern Med*  
420 1998;158:166–72. <https://doi.org/10.1001/archinte.158.2.166>.
- 421 [47] Finley CR, Chan DS, Garrison S, Korownyk C, Kolber MR, Campbell S, et al. What are the most common  
422 conditions in primary care? Systematic review. *Can Fam Physician Med Fam Can* 2018;64:832–40.

- 423 [48] Spatial Autocorrelation - an overview | ScienceDirect Topics 2022.  
424 <https://www.sciencedirect.com/topics/computer-science/spatial-autocorrelation> (accessed December 3, 2022).
- 425 [49] How Spatial Autocorrelation (Global Moran's I) works—ArcGIS Pro | Documentation 2022.  
426 [https://pro.arcgis.com/en/pro-app/latest/tool-reference/spatial-statistics/h-how-spatial-autocorrelation-moran-](https://pro.arcgis.com/en/pro-app/latest/tool-reference/spatial-statistics/h-how-spatial-autocorrelation-moran-s-i-spatial-st.htm)  
427 [s-i-spatial-st.htm](https://pro.arcgis.com/en/pro-app/latest/tool-reference/spatial-statistics/h-how-spatial-autocorrelation-moran-s-i-spatial-st.htm) (accessed December 1, 2022).
- 428 [50] Monzur T. Local Moran's I calculation 2022.
- 429 [51] Alam M. Spatial Autocorrelation: Neighbors Affecting Neighbors. Medium 2020.  
430 <https://towardsdatascience.com/spatial-autocorrelation-neighbors-affecting-neighbors-ed4fab8a4aac> (accessed  
431 December 1, 2022).
- 432 [52] GISGeography. Spatial Autocorrelation and Moran's I in GIS. GIS Geogr 2014.  
433 <https://gisgeography.com/spatial-autocorrelation-moran-i-gis/> (accessed December 2, 2022).
- 434 [53] clubdebambos. What is Hotspot Analysis? Geospatiality 2016. [https://glenbambrick.com/2016/01/21/what-is-](https://glenbambrick.com/2016/01/21/what-is-hotspot-analysis/)  
435 [hotspot-analysis/](https://glenbambrick.com/2016/01/21/what-is-hotspot-analysis/) (accessed December 2, 2022).
- 436 [54] Anselin L. Local Indicators of Spatial Association—LISA. Geogr Anal 1995;27:93–115.  
437 <https://doi.org/10.1111/j.1538-4632.1995.tb00338.x>.
- 438 [55] Anselin L. Local Spatial Autocorrelation Clusters 2016:33.

439

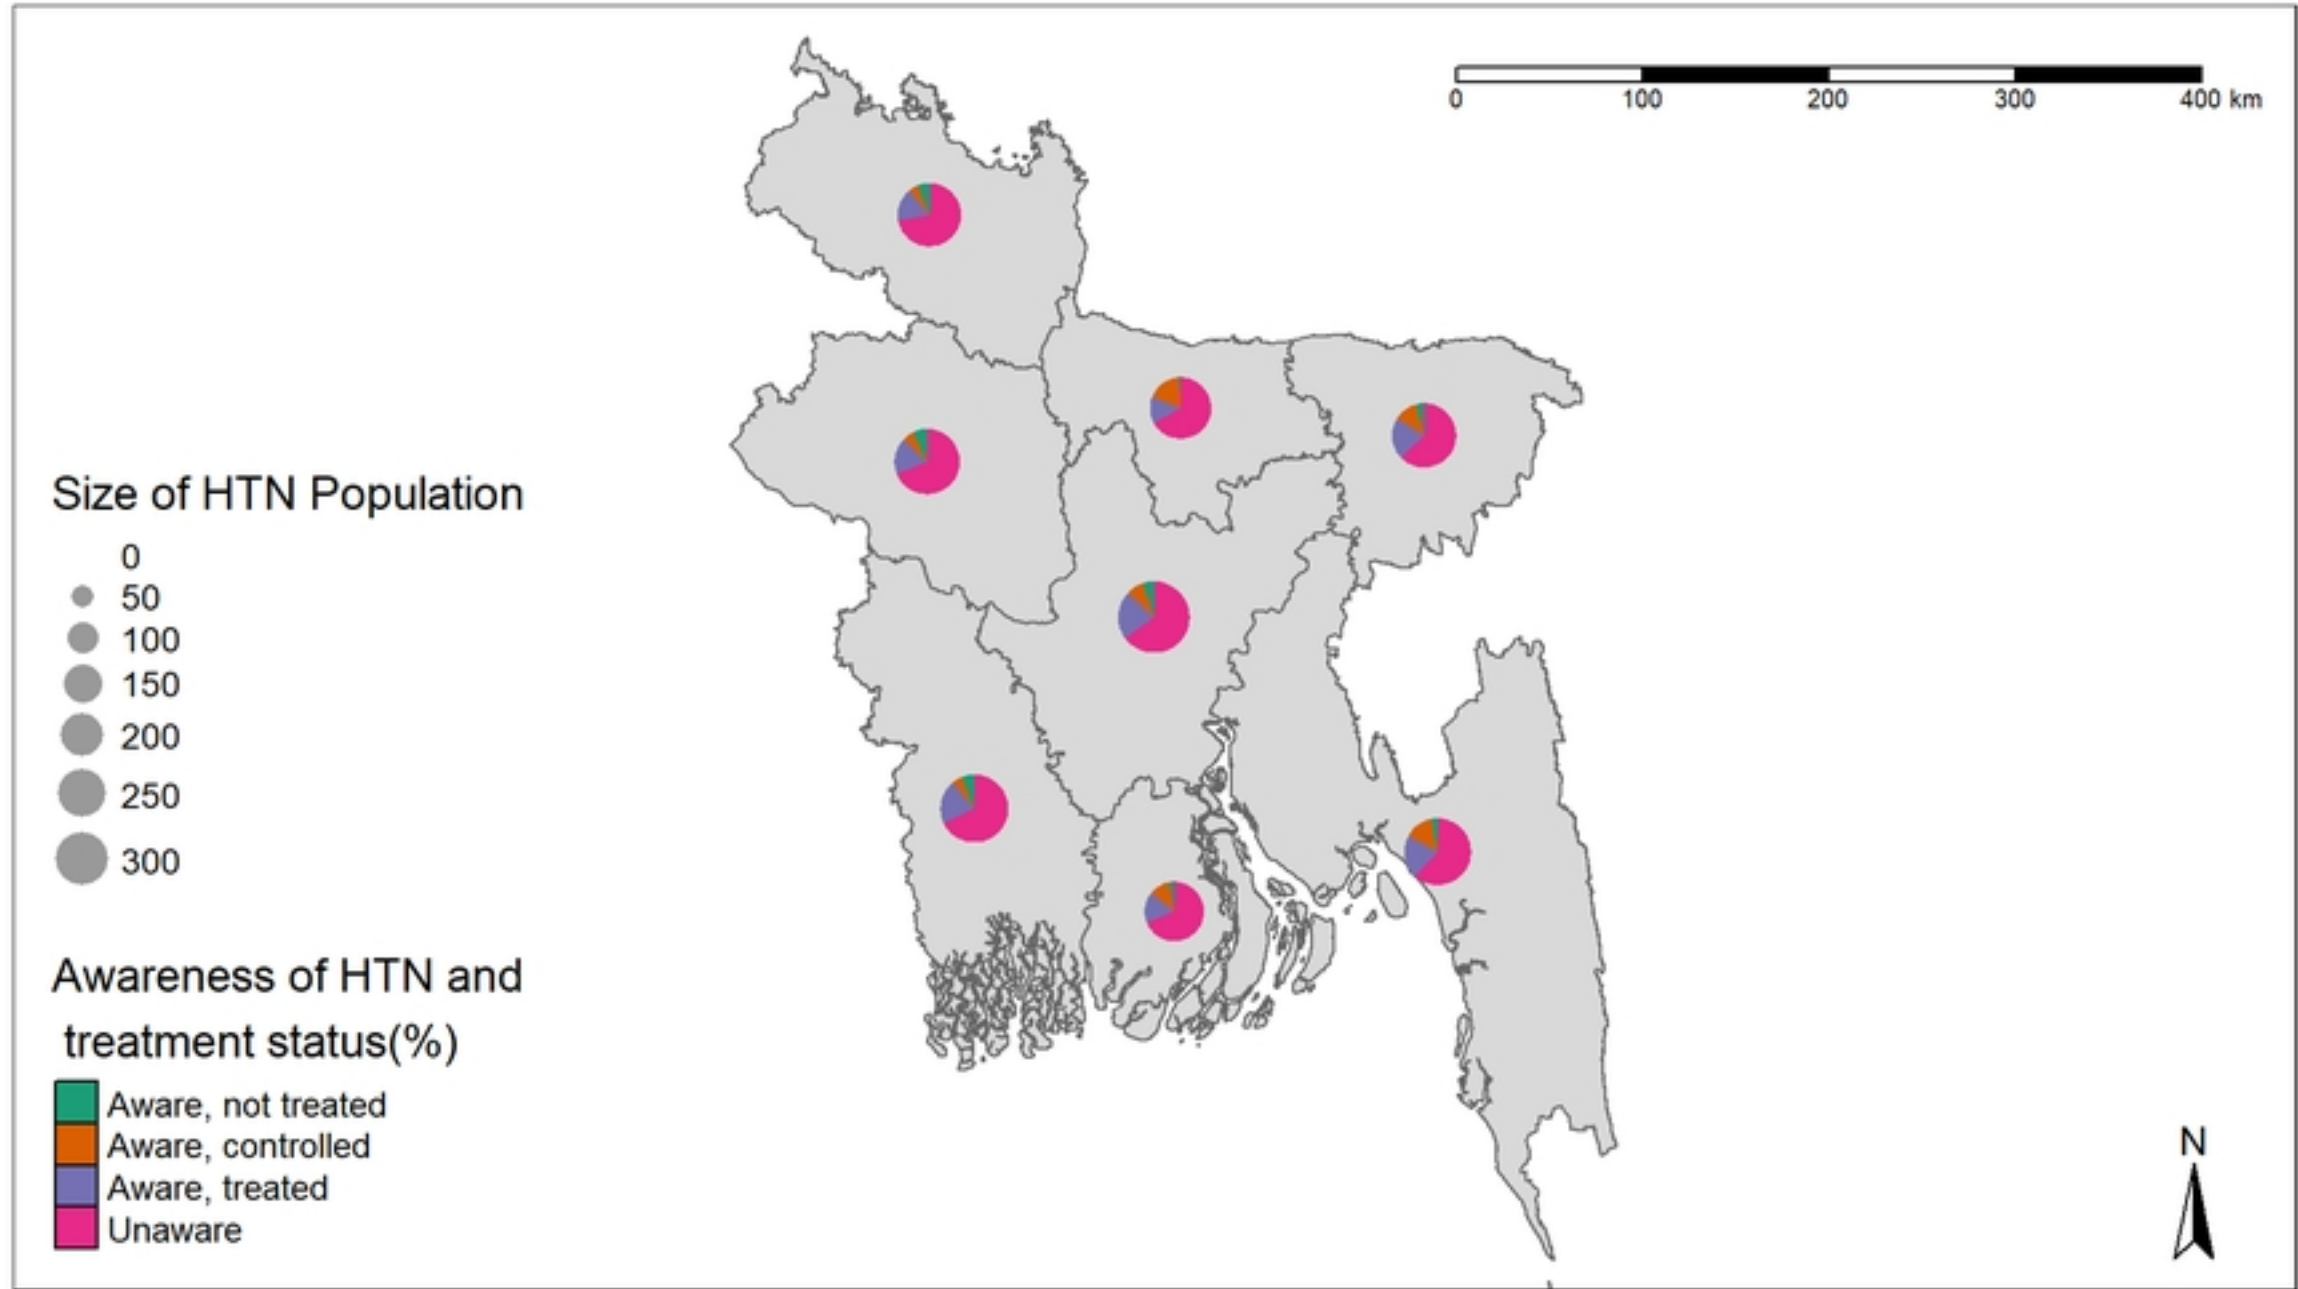

Fig 1

# Awareness, Treatment and Control map for women

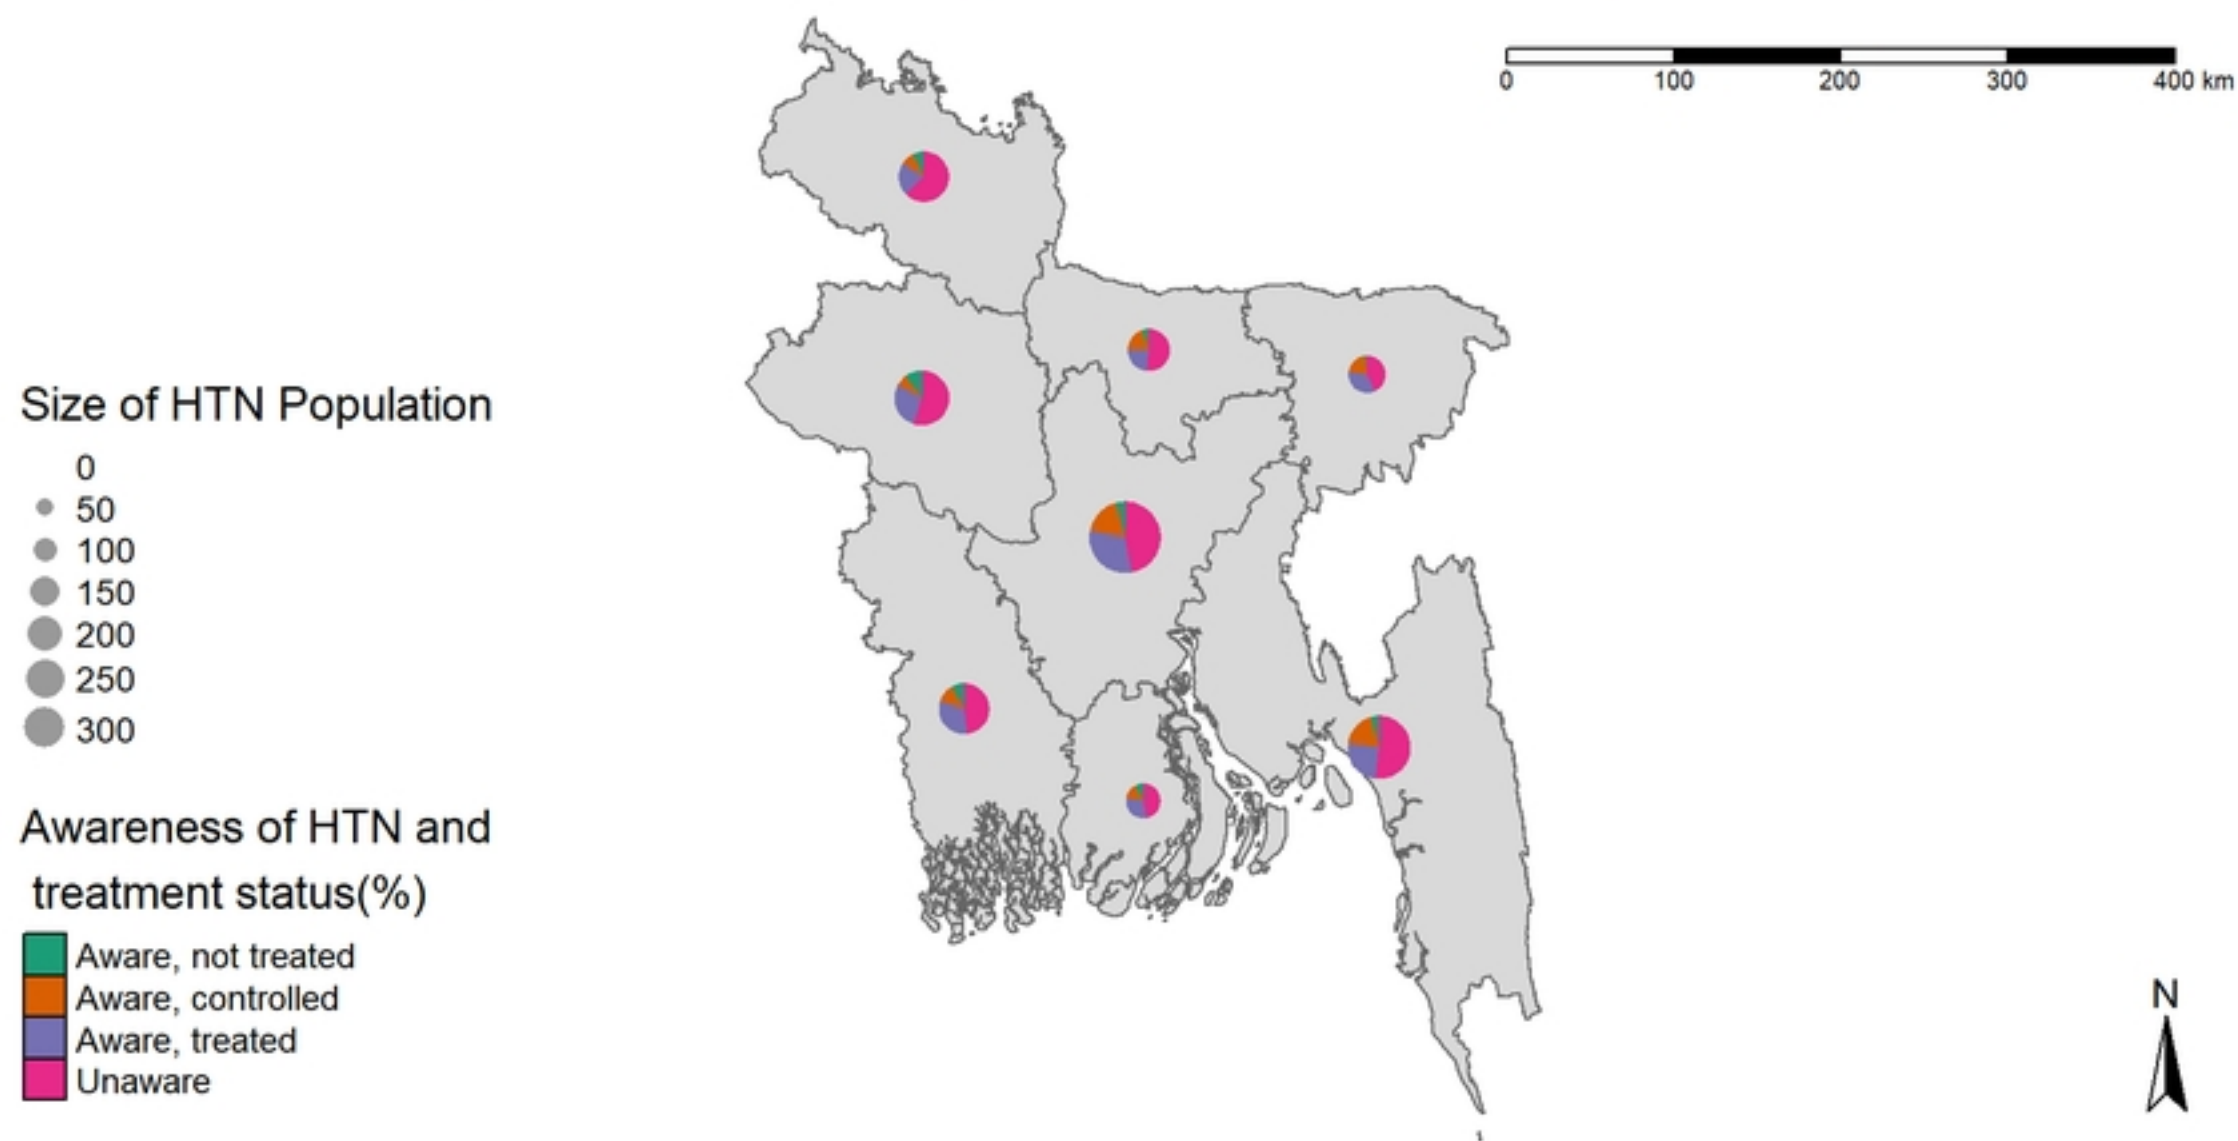

Fig 2

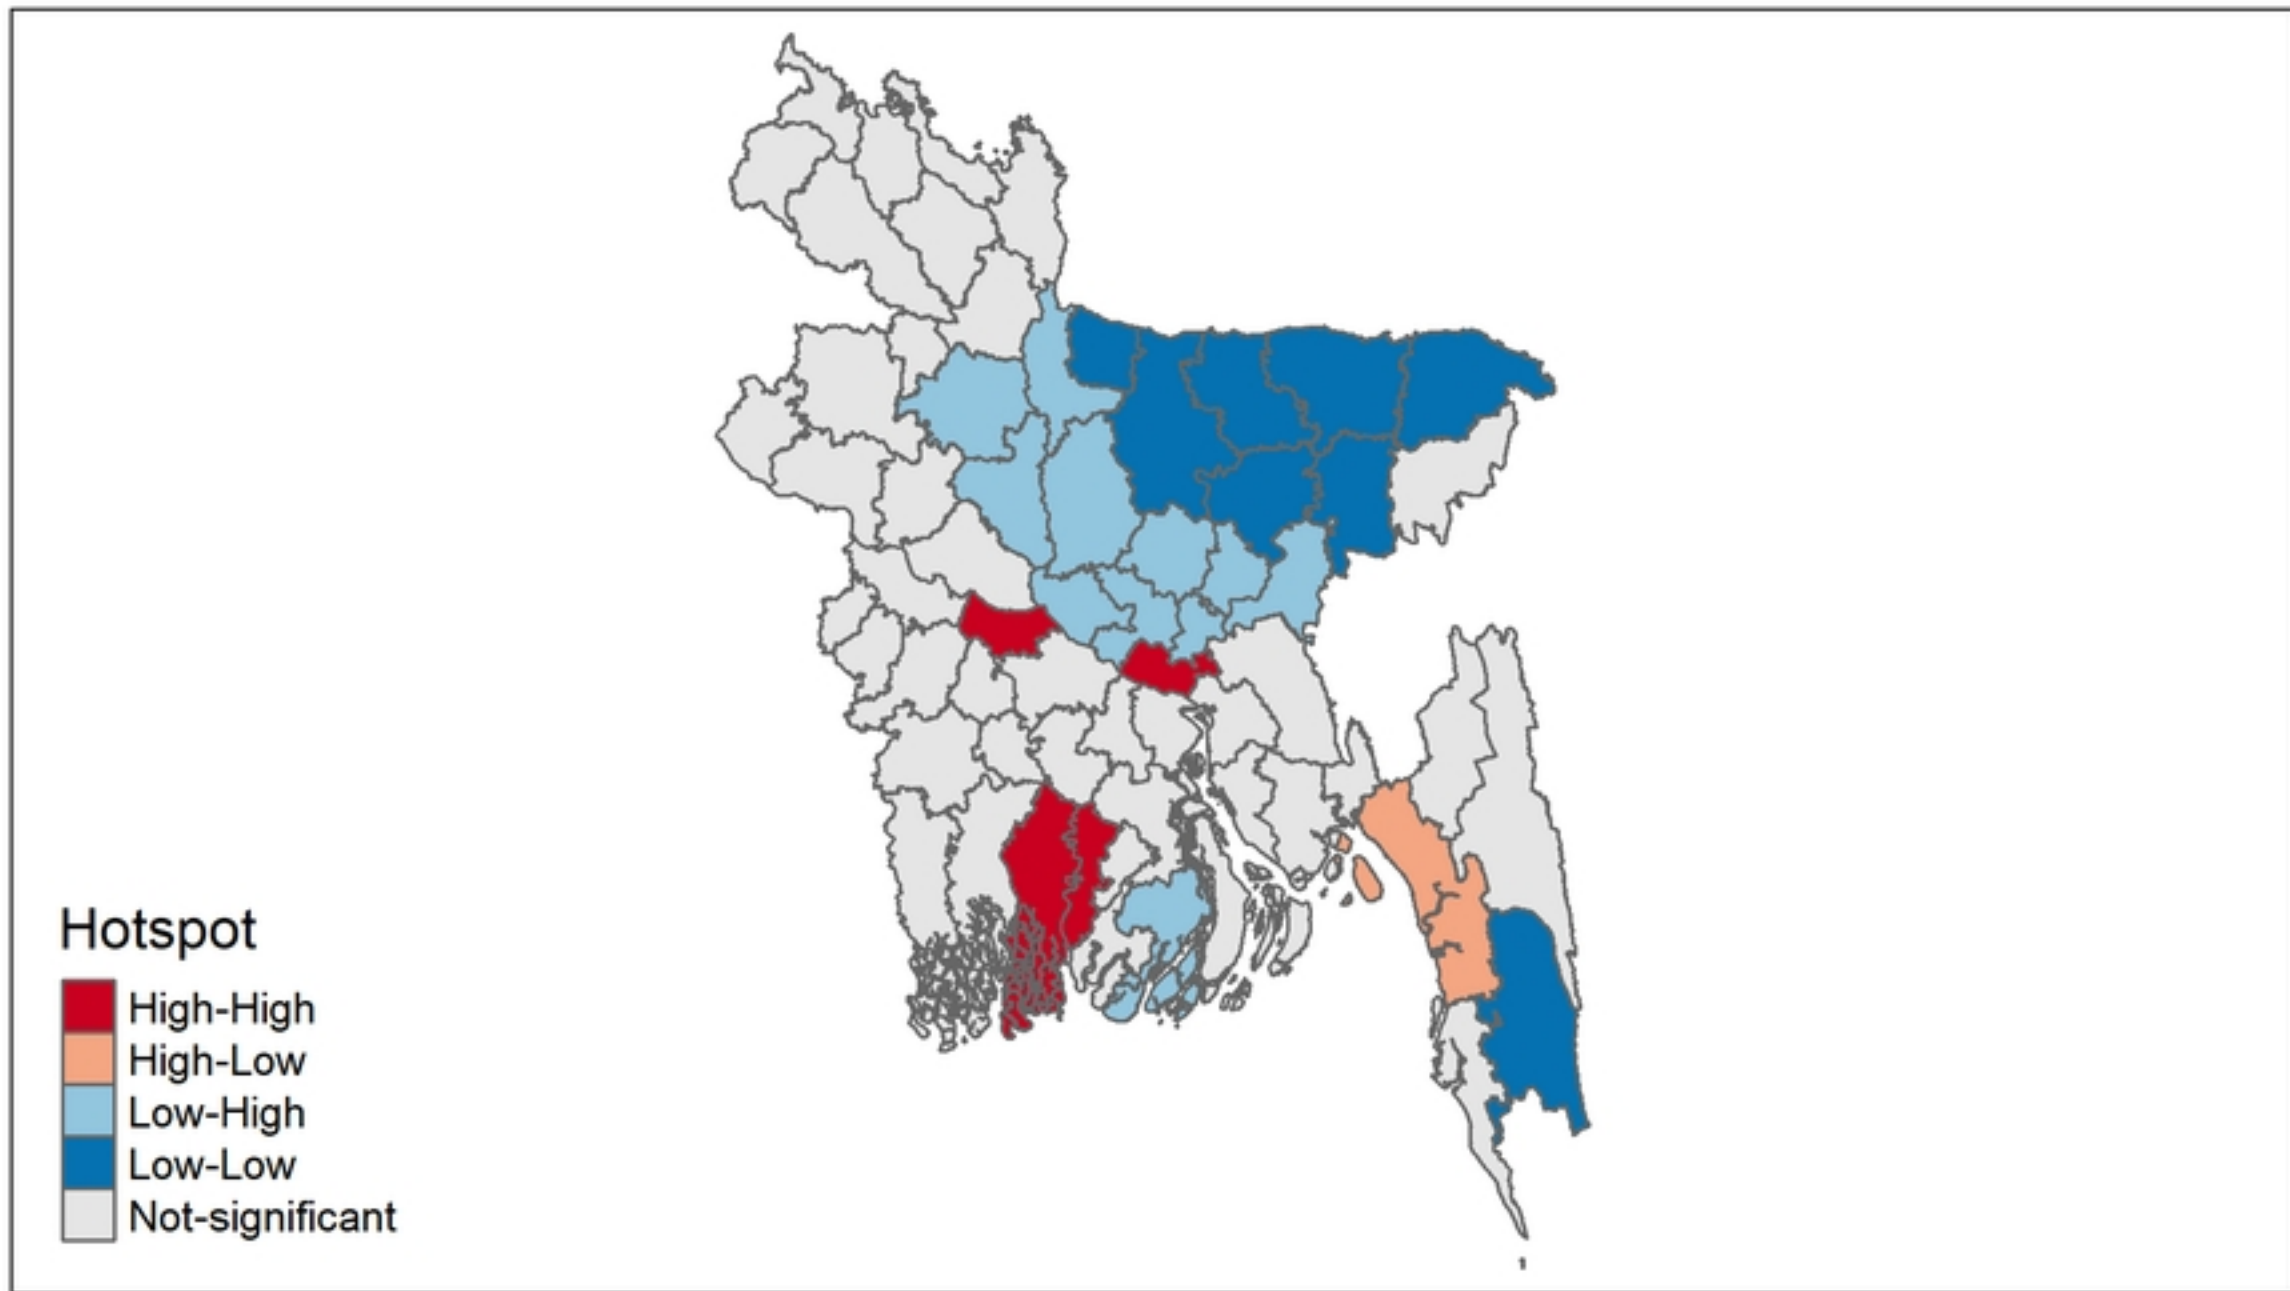

Fig 3



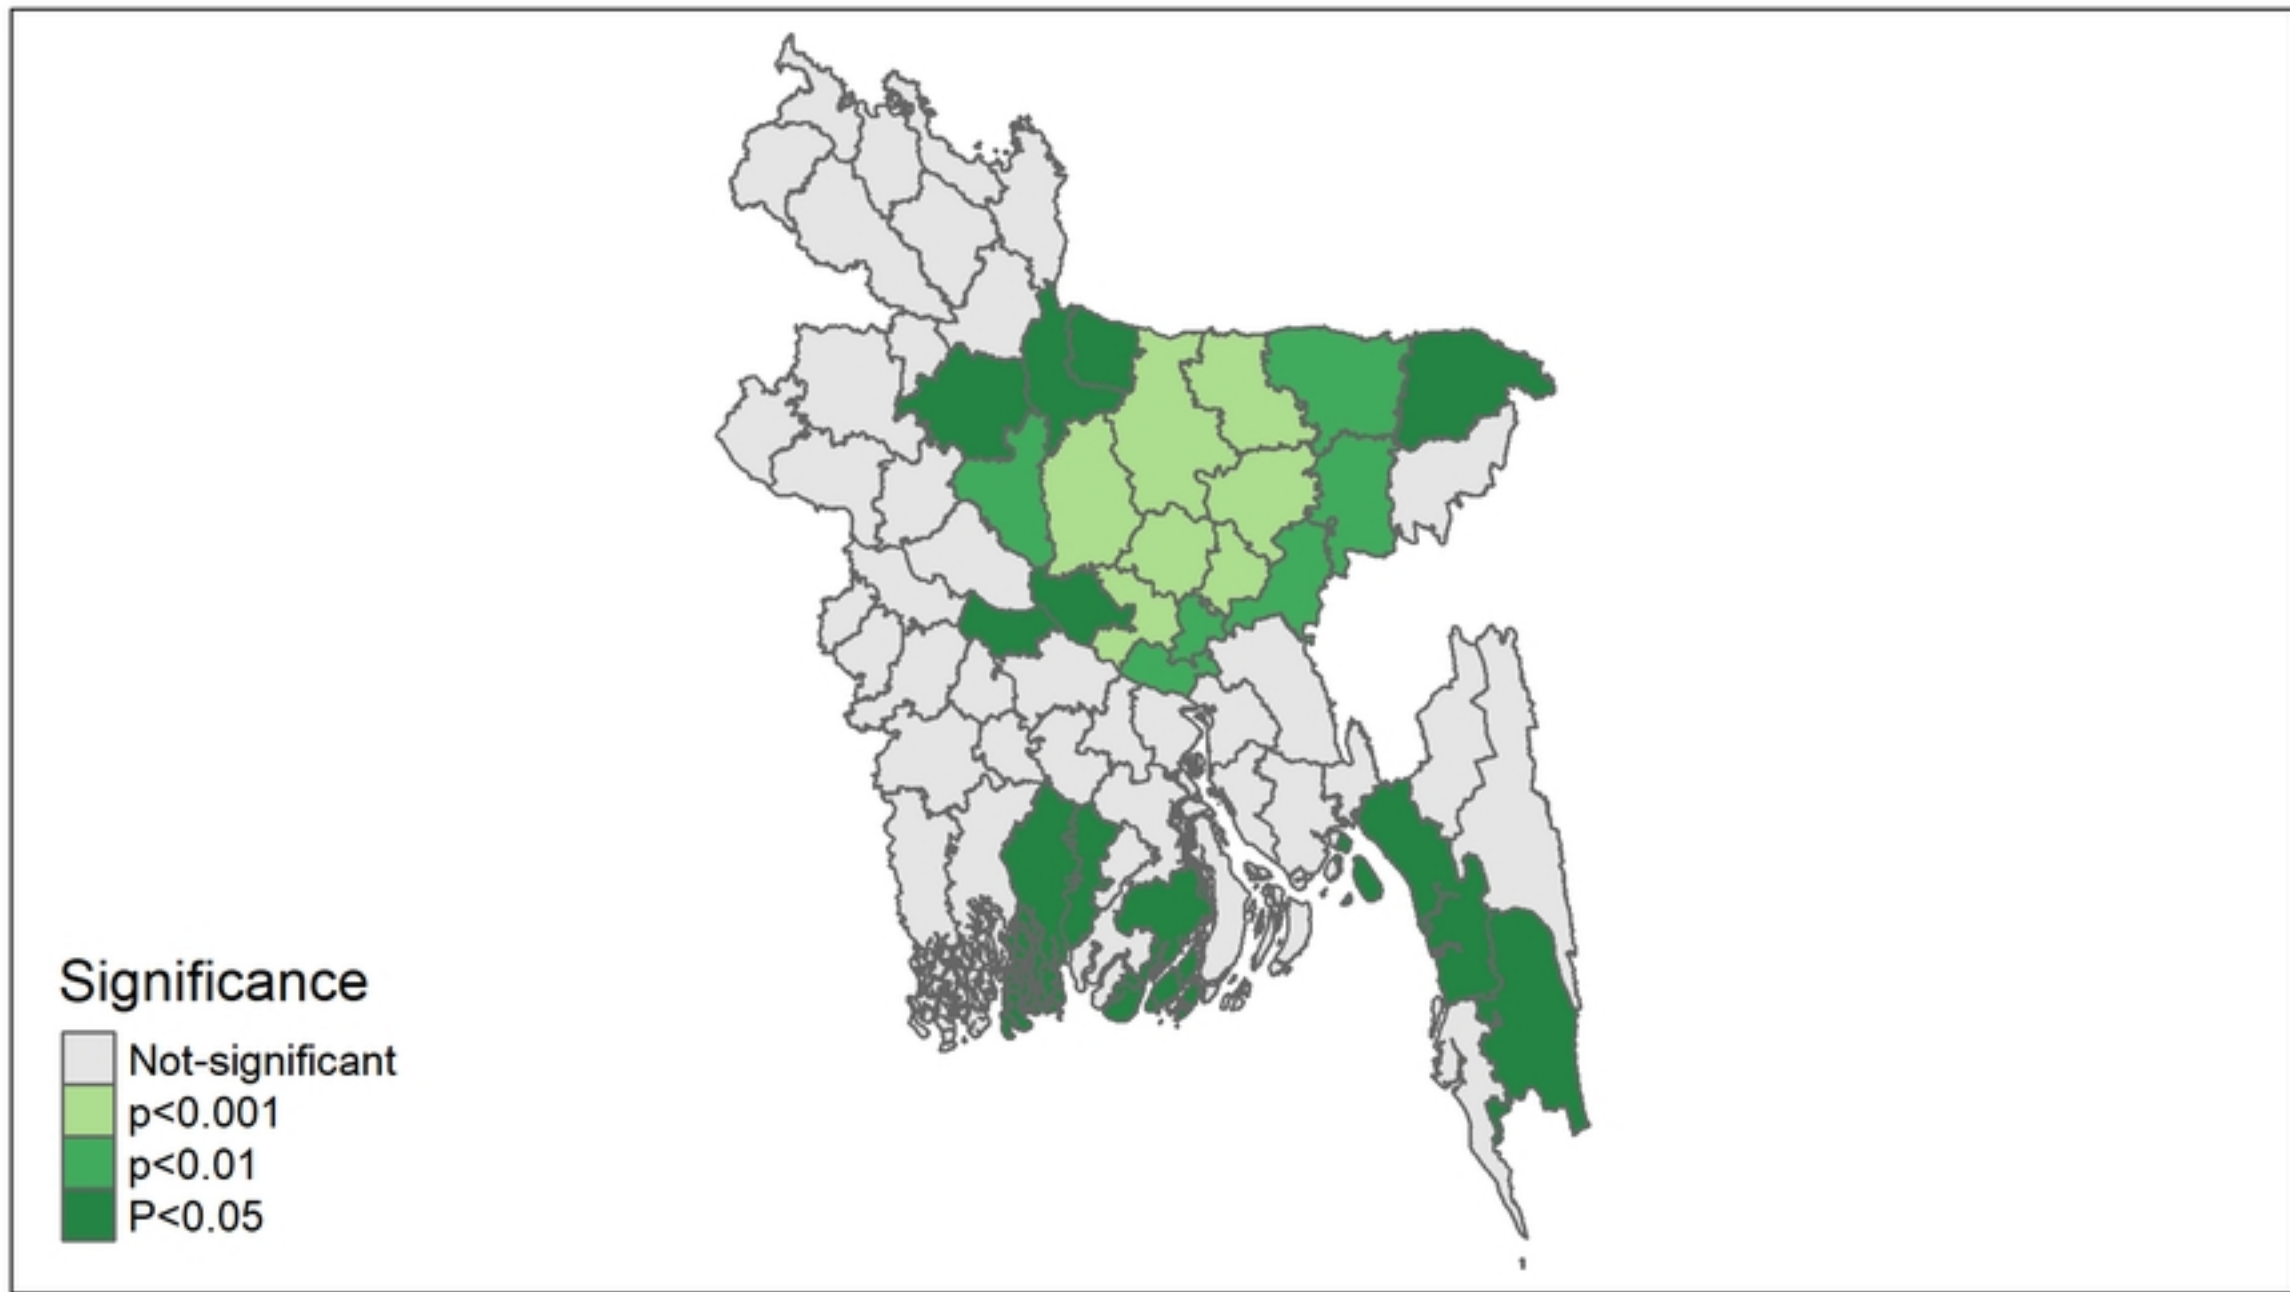

Fig 4
